# Supplementary material
Source: PubMed Central journal article supplement (PMC3123528)
Supplement: supp_data.pdf [file supp_data.pdf]

## Supplementary Data

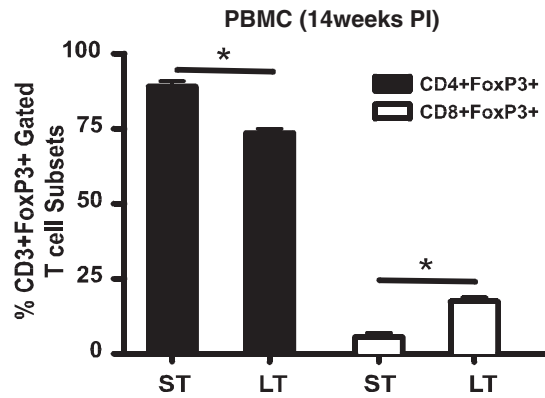

SUPPLEMENTARY FIG. S1. Higher frequencies of CD8<sup>+</sup>FoxP3<sup>+</sup> T cells are present 1 week after initiation of therapy in late-continuous treated animals. Proportions of CD3<sup>+</sup>FoxP3<sup>+</sup> T cell subsets in peripheral blood of short-term treated control (ST) and late-continuous treated (LT) animals at 14 weeks pi. \* $p < 0.05$ .
